# Supplementary material
Source: Springer Nature journal article supplement (https://www.springermedizin.de/resource/supplementary/12899_2010_168_MOESM10_ESM.pdf/9514586)

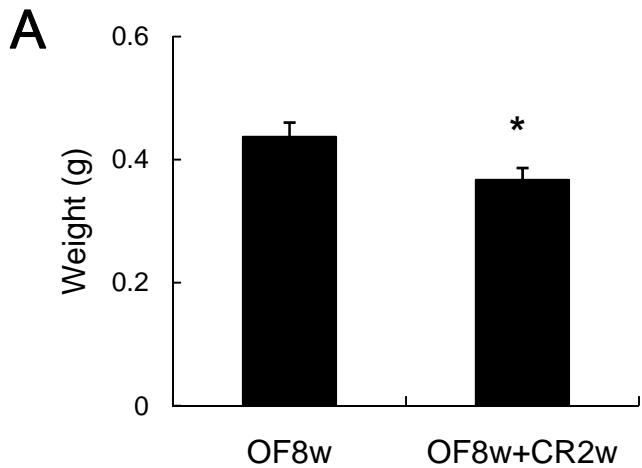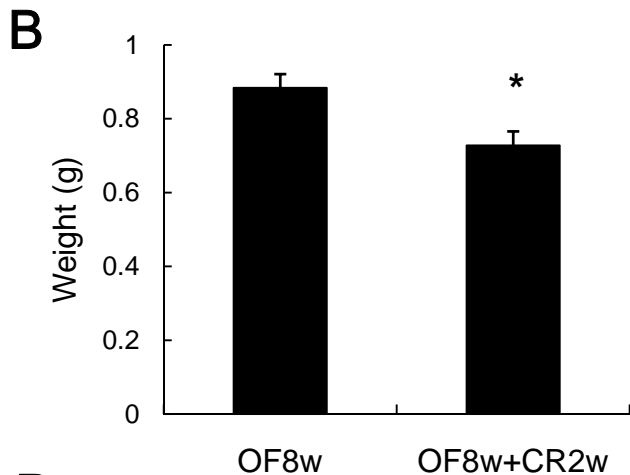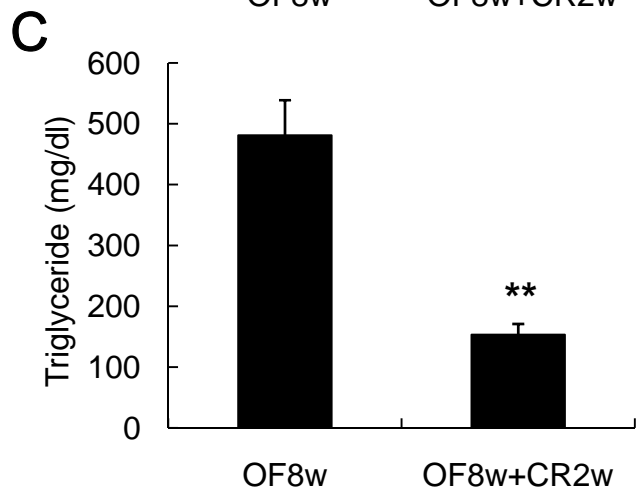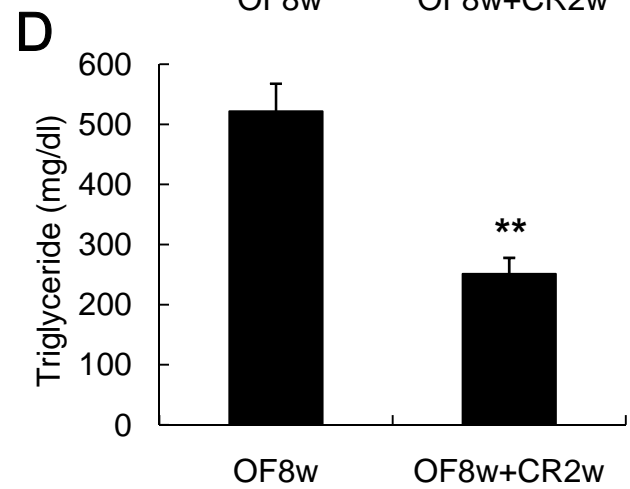

Supplement: MOESM10 [file 9514586]
